# Supplementary material
Source: HighWire-hosted journal article supplement (https://erj.ersjournals.com/content/55/4/2000475)
Supplement: inline-supplementary-material-1 [file inline-supplementary-material-1.pdf]

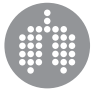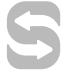

SHAREABLE PDF

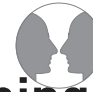

AGORA  
CORRESPONDENCE

# Latent tuberculosis screening and treatment among asylum seekers: a mixed-methods study

Ineke Spruijt <sup>1</sup>, Connie Erkens<sup>1</sup>, Susan van den Hof<sup>2</sup> and Frank Cobelens<sup>3</sup>

**Affiliations:** <sup>1</sup>KNCV Tuberculosis Foundation, The Hague, The Netherlands. <sup>2</sup>National Institute for Public Health and the Environment (RIVM), Centre for Infectious Disease Control, Bilthoven, The Netherlands. <sup>3</sup>Dept of Global Health and Amsterdam Institute for Global Health and Development, Amsterdam University Medical Centre, location Academic Medical Centre, Amsterdam, The Netherlands.

**Correspondence:** Ineke Spruijt, KNCV Tuberculosefonds, Benoordenhoutseweg 46, The Hague 2501 CC, The Netherlands. E-mail: [ineke.spruijt@kncvtbc.org](mailto:ineke.spruijt@kncvtbc.org)

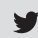

@ERSpublications

**Europe-wide collaboration for the identification and treatment of latent tuberculosis infection is important to further address and prevent tuberculosis among high-risk asylum seekers. To achieve this, existing barriers need to be addressed.** <https://bit.ly/2JoFiqx>

**Cite this article as:** Spruijt I, Erkens C, van den Hof S, *et al.* Latent tuberculosis screening and treatment among asylum seekers: a mixed-methods study. *Eur Respir J* 2020; 55: 2000475 [<https://doi.org/10.1183/13993003.00475-2020>].

This single-page version can be shared freely online.

## *From the authors:*

We thank S. Villa and colleagues for their compliments on our work and are pleased to read that in Milan the latent tuberculosis (TB) infection (LTBI) screening and treatment of asylum seekers reach similar successful results.
